# Supplementary material
Source: publisher figshare collection journal article supplement (https://acs.figshare.com/ndownloader/files/15551081)
Supplement: Supplementary file 1 [file 15551081]

## SUPPORTING INFORMATION:

### Towards the Optimization of Dinitrosyl Iron Complexes as Therapeutics for Smooth Muscle Cells

Chase Pectol<sup>1</sup>, Sarosh Khan<sup>1,4</sup>, Rachel B. Chupik<sup>1</sup>, Mahmoud Elsabahy<sup>1,4</sup>, Karen L. Wooley<sup>1,2,3,4</sup>, Marcetta Y. Darensbourg<sup>1\*</sup>, and Soon-Mi Lim<sup>1,4\*</sup>

<sup>1</sup>Departments of Chemistry, <sup>2</sup>Chemical Engineering, <sup>3</sup>Materials Science & Engineering, and <sup>4</sup>the Laboratory for Synthetic-Biologic Interactions, Texas A&M University, College Station, Texas 77842-3012, United States

#### Contents:

|                                                                                                                                                                                                                                                                                                                                                             |   |
|-------------------------------------------------------------------------------------------------------------------------------------------------------------------------------------------------------------------------------------------------------------------------------------------------------------------------------------------------------------|---|
| S1 – Other trials of MTS viability assay curves of SMC treated with reported DNIC complexes                                                                                                                                                                                                                                                                 | 2 |
| S2 – MTS assay results for RAW 264.7 cells treated with DNIC's and DEANO                                                                                                                                                                                                                                                                                    | 3 |
| S3 – The expression of the mouse cytokines, regulated upon activation normal T-cell expressed and presumably secreted (RANTES) (left panel) and tumor necrosis factor- $\alpha$ (TNF- $\alpha$ ) (right panel), following the treatment of RAW 264.7 cells with media (control), DEANO, neoDNIC, SGluNHC, SGluRRE, SPhNHC and SPhRRE at 5 $\mu$ M for 24 h. | 4 |
| S4 – Confocal microscopy images of intracellular NO content upon treatment with <b>neoDNIC</b>                                                                                                                                                                                                                                                              | 5 |
| S5 – Confocal microscopy images of intracellular NO content upon treatment with <b>SPh/SGluRRE</b> and <b>SPh/SGluNHC</b>                                                                                                                                                                                                                                   | 6 |

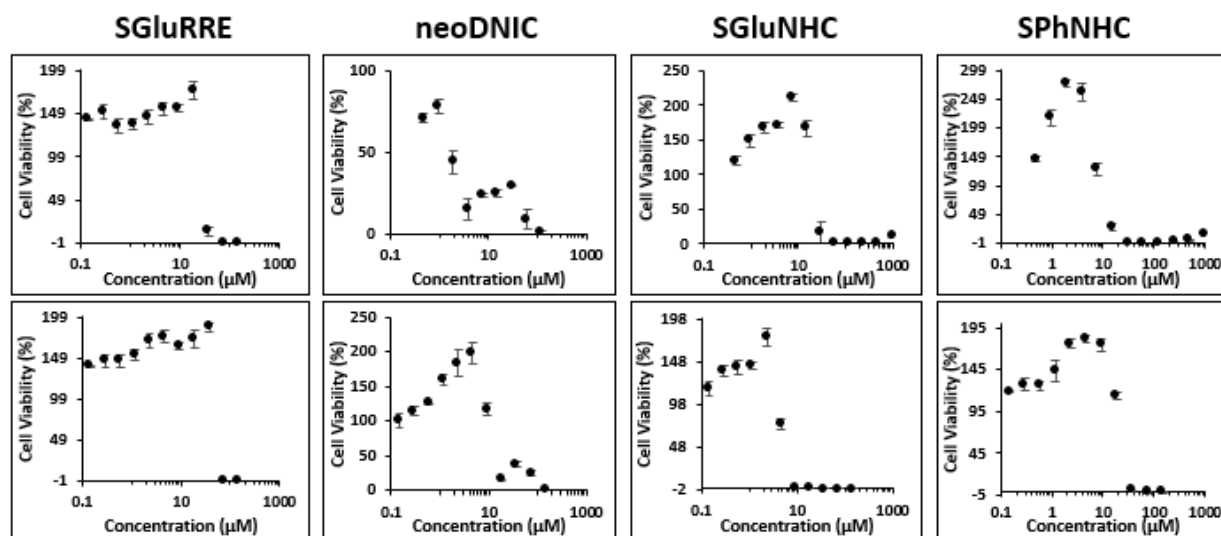

**Figure S1.** MTS viability assay curves for SMC grown to confluence treated with DNIC's at varying concentrations. Each trial is a set of biological triplicates.

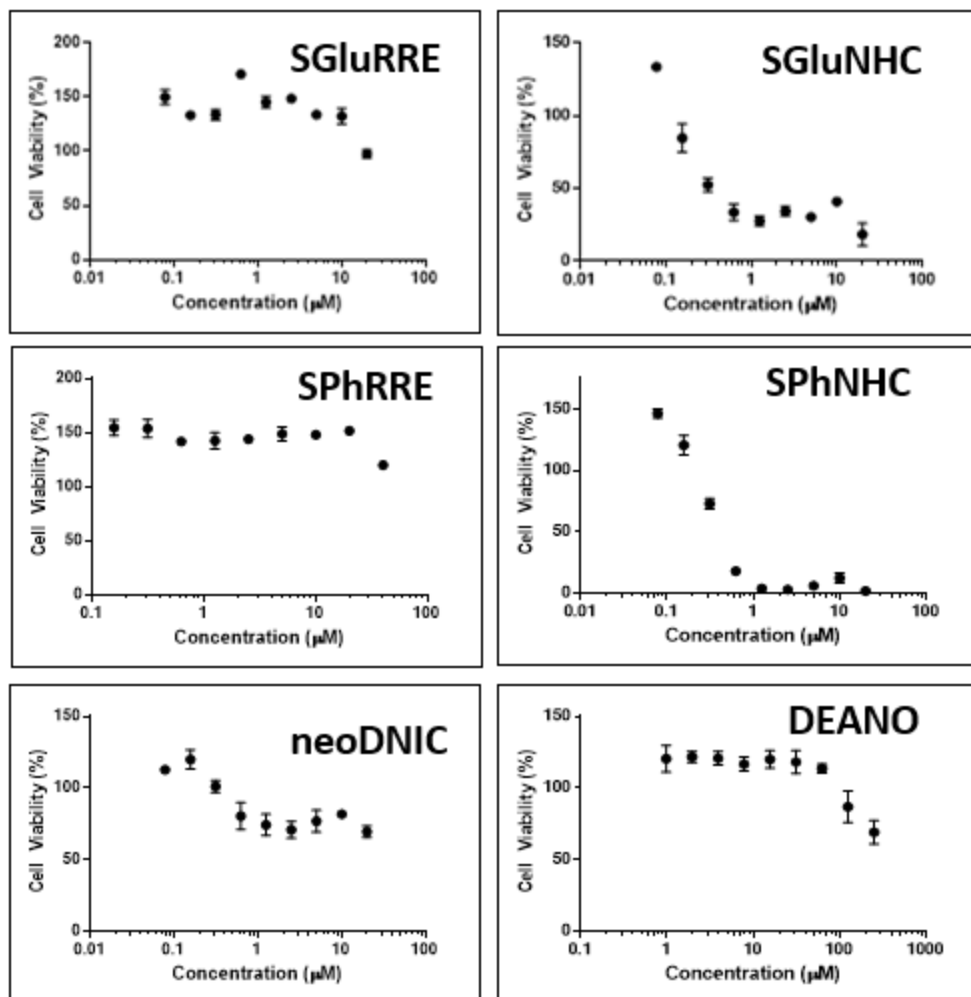

**Figure S2.** MTS viability assay curves for RAW 264.7 cells grown to confluence treated with DNIC's at varying concentrations. Each trial is a set of biological triplicates.

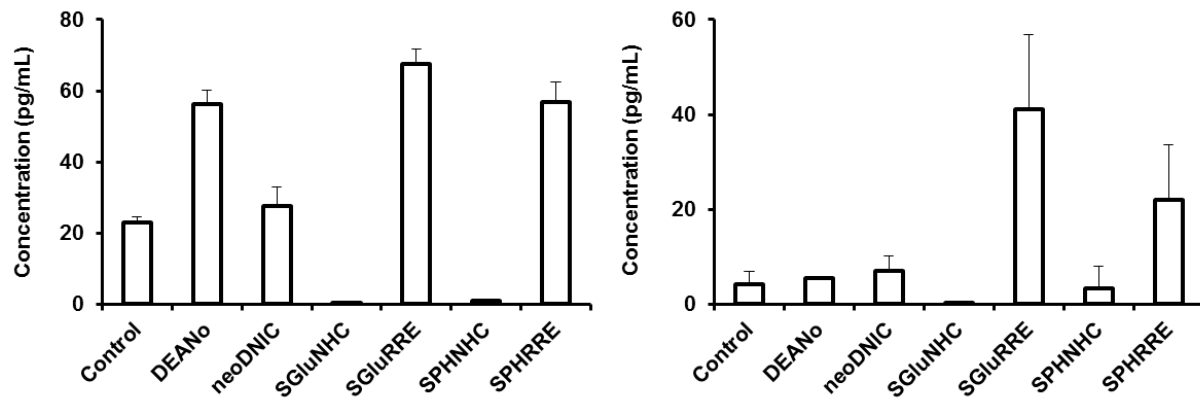

**Figure S3:** The expression of the mouse cytokines, regulated upon activation normal T-cell expressed and presumably secreted (RANTES) (left panel) and tumor necrosis factor- $\alpha$  (TNF- $\alpha$ ) (right panel), following the treatment of RAW 264.7 cells with media (control), **DEANo**, **neoDNIC**, **SGluNHC**, **SGluRRE**, **SPHNHC** and **SPHRRE** at 5  $\mu$ M for 24 h.

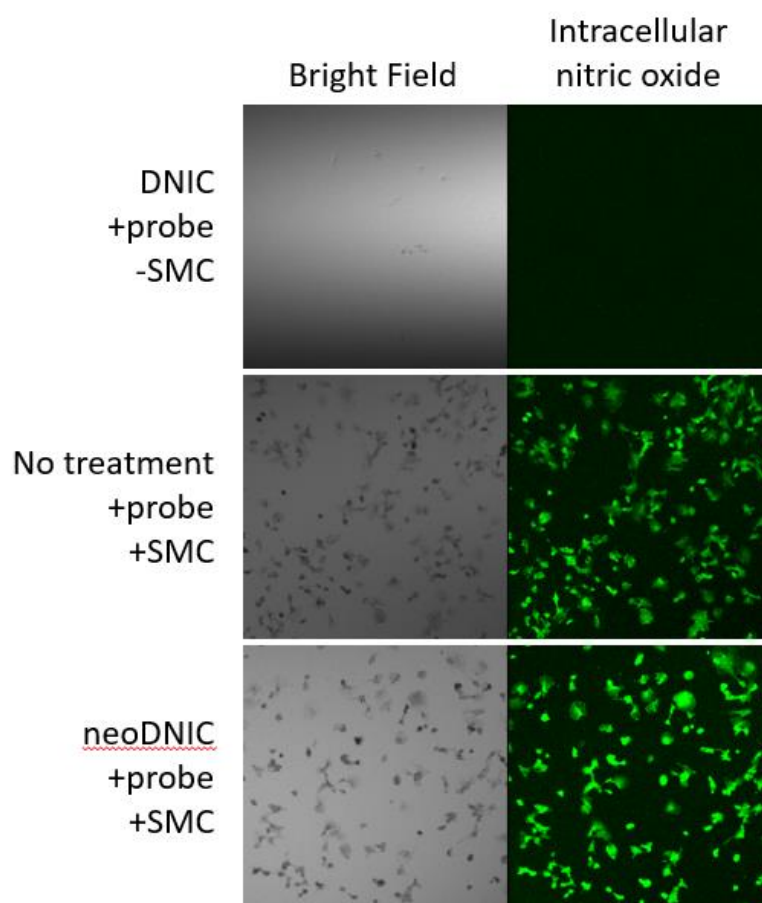

**Figure S4:** Confocal microscopy images collected with a 10x objective (image size  $1.3\ \mu\text{m} \times 1.3\ \mu\text{m}$ ). The brighter the green fluorescence, the more nitric oxide present. Concentrations of DNIC are as follows.  $30\ \mu\text{M}$ : **SPhRRE**, **SGLuRRE**;  $5\ \mu\text{M}$  **neoDNIC**;  $3\ \mu\text{M}$ : **SPhNHC**, **SGLuNHC**. To aid in visualization,  $100\ \mu\text{M}$  L-NNA (L-nitroarginine), an NOS inhibitor was added to each well.

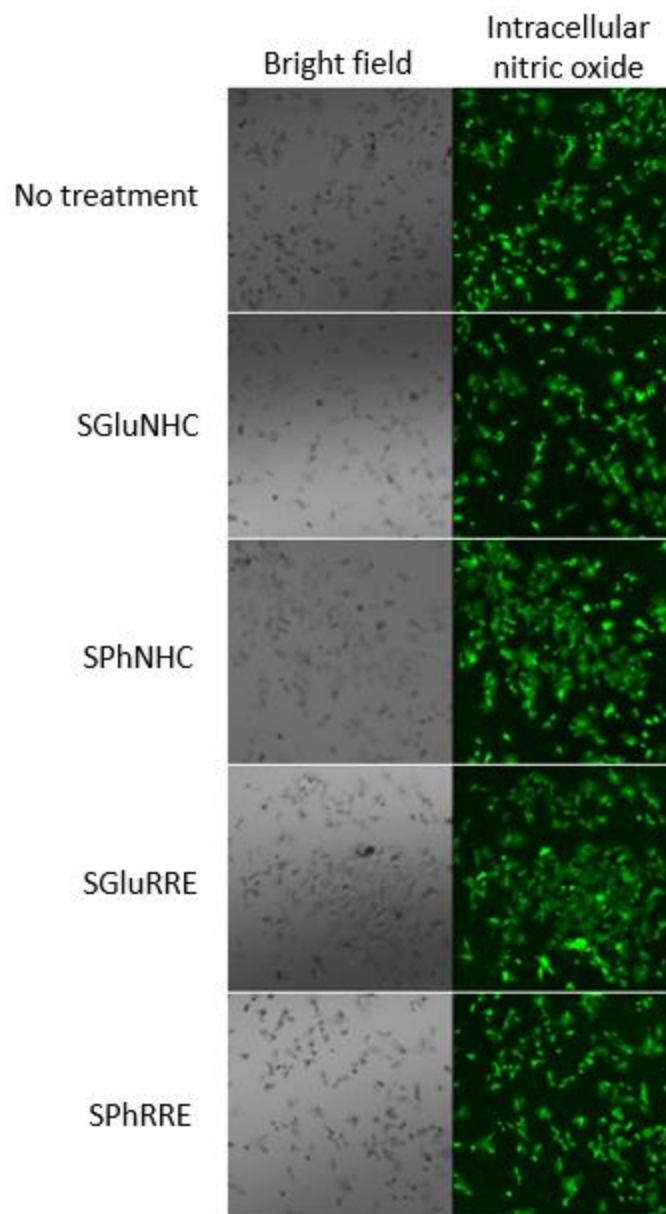

**Figure S5:** Confocal microscopy images collected with a 10x objective (image size  $1.3\ \mu\text{m} \times 1.3\ \mu\text{m}$ ). The brighter the green fluorescence, the more nitric oxide present. Concentrations of DNIC are as follows.  $30\ \mu\text{M}$ : **SPhRRE**, **SGLuRRE**;  $3\ \mu\text{M}$ : **SPhNHC**, **SGLuNHC**. To aid in visualization,  $100\ \mu\text{M}$  L-NNA (L-nitroarginine), an NOS inhibitor, was added to each well. No treatment indicates that only L-NNA was present and no DNIC treatments were added.
